# Supplementary material for: Synthesis, crystal structures, and surface photovoltage properties of four new metal diphosphonates based on the mixed ligands
Source: Royal Society of Chemistry journal article supplement (doi:10.1039/c2ce26472b), 2012-12-17
Supplement: c2ce26472b.pdf [file c2ce26472b.pdf]

# Synthesis, crystal structures, and surface photovoltage properties of four new metal diphosphonates based on the mixed ligands

Ming-Jing Zheng, Yan-Yu Zhu, Zhen-Gang Sun,\* Jiang Zhu, Cheng-Qi Jiao, Wei Chu, Shou-Hui Sun and Hui Tian

## Supporting Information

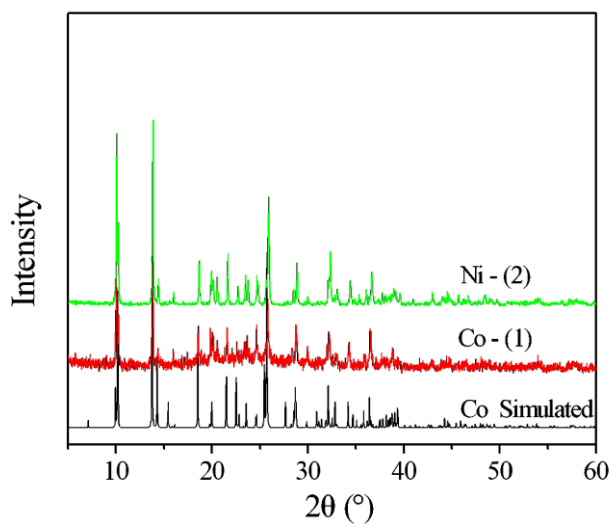

**Fig. S1** The experimental powder XRD patterns of compounds **1** and **2** and the simulated XRD pattern of compound **1**.

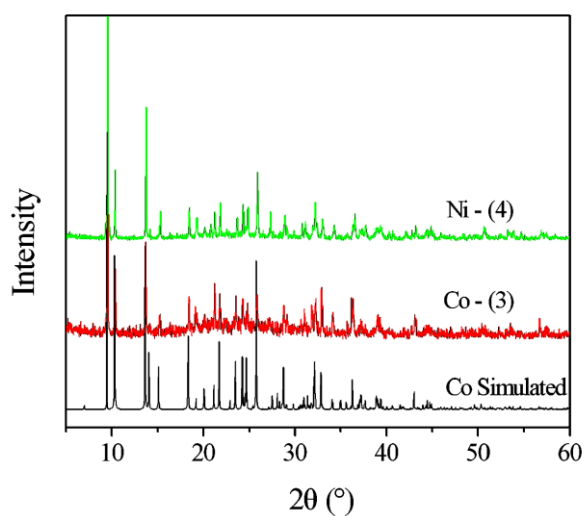

**Fig. S2** The experimental powder XRD patterns of compounds **3** and **4** and the simulated XRD pattern of compound **3**.

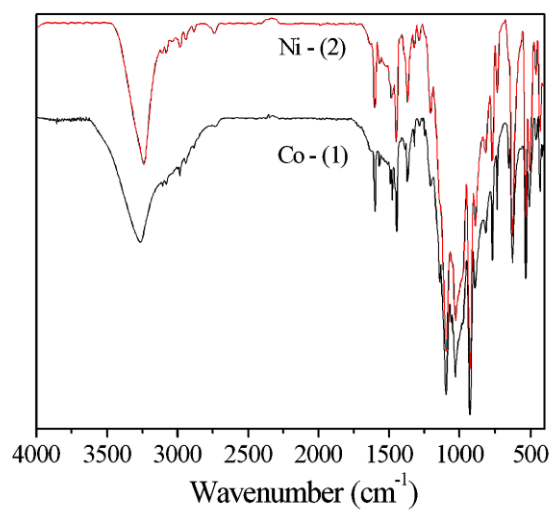

**Fig. S3** The IR spectra of compounds **1** and **2**.

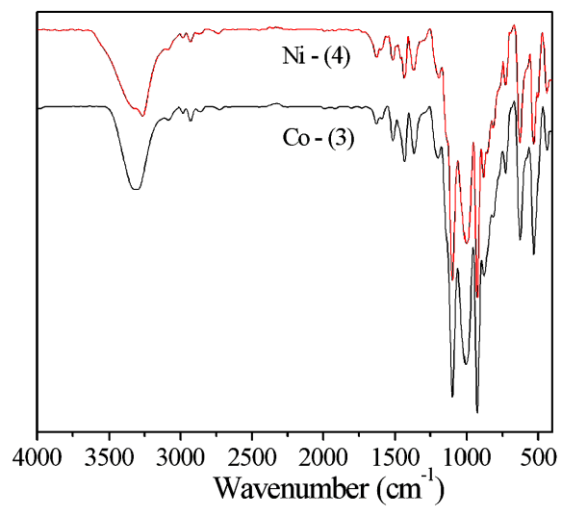

**Fig. S4** The IR spectra of compounds **3** and **4**.

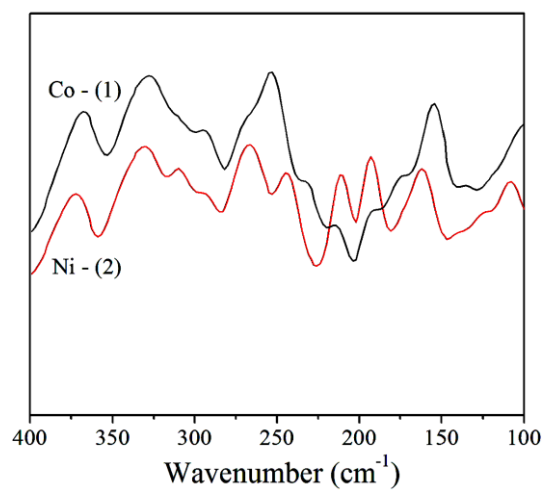

**Fig. S5** The FIR spectra of compounds **1** and **2**.

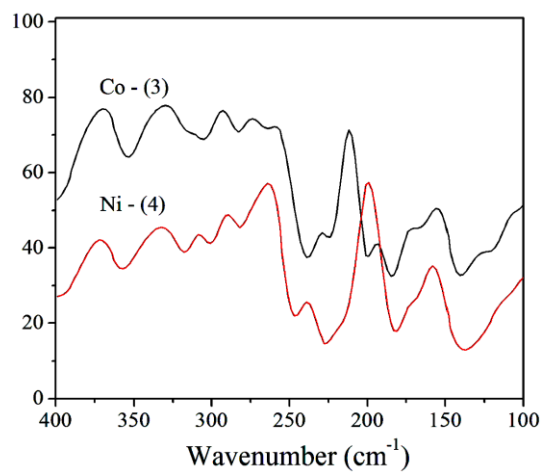

**Fig. S6** The FIR spectra of compounds **3** and **4**.

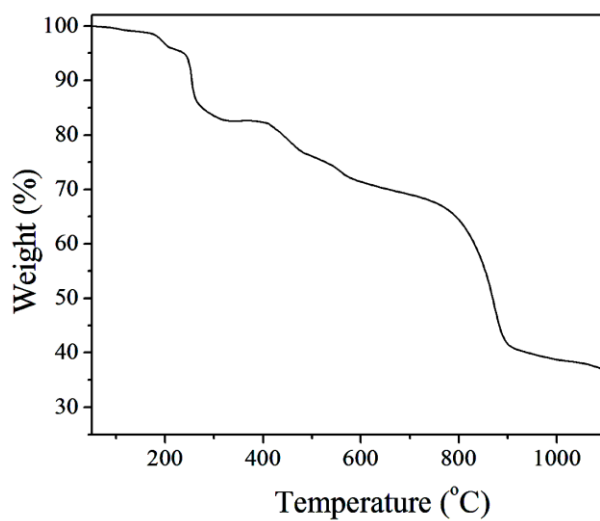

**Fig. S7** The TG curve (5 K/min) of compound **2**.

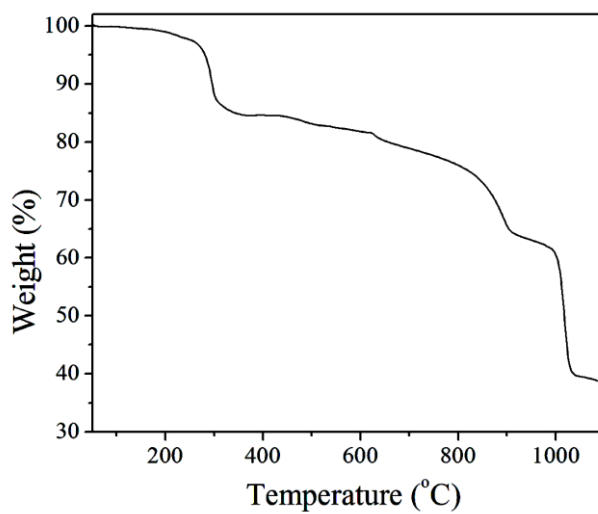

**Fig. S8** The TG curve (5 K/min) of compound **4**.

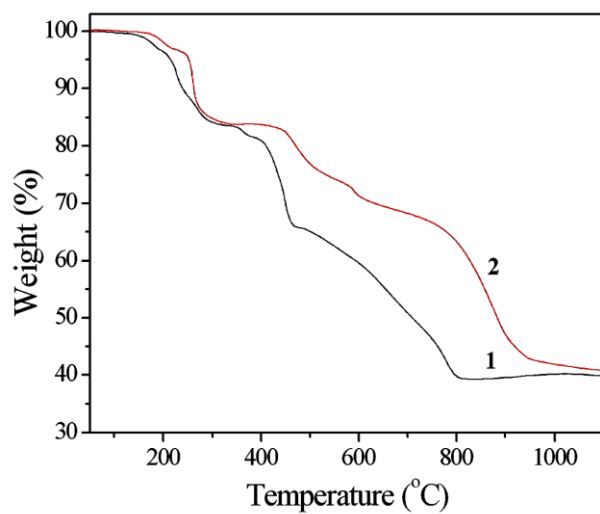

**Fig. S9** The TG curves (10 K/min) of compounds **1** and **2**.

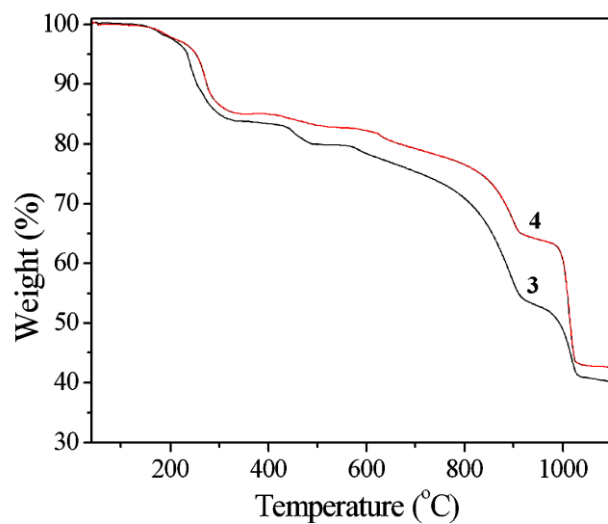

**Fig. S10** The TG curves (10 K/min) of compounds **3** and **4**.

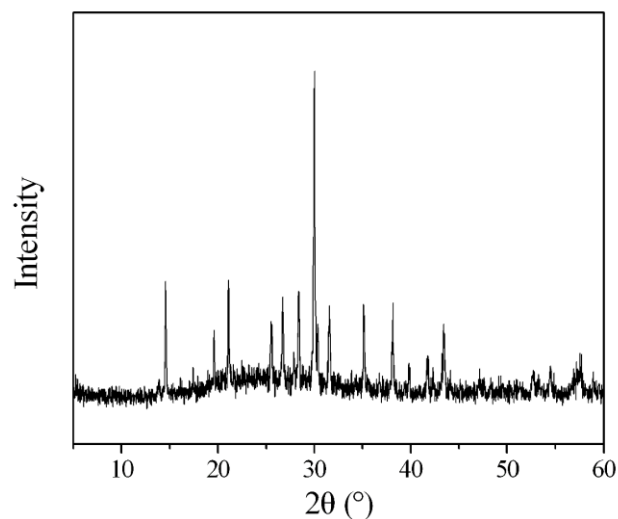

**Fig. S11** The X-ray power diffraction patterns of the final product in the thermal decomposition for compound **2**.  
The final product is Ni(PO<sub>3</sub>)<sub>2</sub> (JCPDS 00-028-0708).

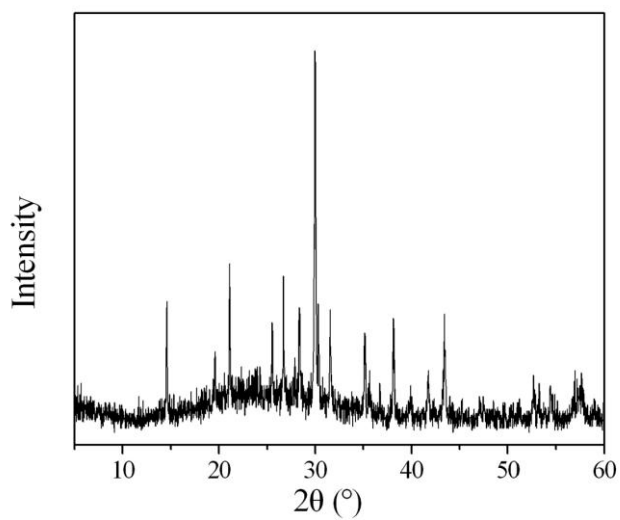

**Fig. S12** The X-ray power diffraction patterns of the final product in the thermal decomposition for compound **4**.  
The final product is Ni(PO<sub>3</sub>)<sub>2</sub> (JCPDS 00-028-0708).

**Table S1** Selected bond lengths (Å) and angles (deg) for compounds **1** and **2**<sup>a</sup>

| Compound 1          |            |                     |            |
|---------------------|------------|---------------------|------------|
| Co(1)–N(1)#1        | 2.095(5)   | P(1)–O(3)           | 1.514(4)   |
| Co(1)–N(1)          | 2.095(5)   | P(1)–O(1)           | 1.556(4)   |
| Co(1)–O(6)#1        | 2.100(4)   | P(1)–C(1)           | 1.834(5)   |
| Co(1)–O(6)          | 2.100(4)   | P(2)–O(6)           | 1.497(4)   |
| Co(1)–O(3)#1        | 2.147(4)   | P(2)–O(4)           | 1.544(4)   |
| Co(1)–O(3)          | 2.147(4)   | P(2)–O(5)           | 1.569(4)   |
| P(1)–O(2)           | 1.508(4)   | P(2)–C(1)           | 1.835(5)   |
|                     |            |                     |            |
| N(1)#1–Co(1)–N(1)   | 78.5(3)    | O(6)#1–Co(1)–O(3)#1 | 93.62(14)  |
| N(1)#1–Co(1)–O(6)#1 | 98.39(17)  | O(6)–Co(1)–O(3)#1   | 84.75(14)  |
| N(1)–Co(1)–O(6)#1   | 176.84(17) | N(1)#1–Co(1)–O(3)   | 87.09(15)  |
| N(1)#1–Co(1)–O(6)   | 176.84(17) | N(1)–Co(1)–O(3)     | 94.61(16)  |
| N(1)–Co(1)–O(6)     | 98.39(17)  | O(6)#1–Co(1)–O(3)   | 84.75(14)  |
| O(6)#1–Co(1)–O(6)   | 84.8(2)    | O(6)–Co(1)–O(3)     | 93.62(14)  |
| N(1)#1–Co(1)–O(3)#1 | 94.61(16)  | O(3)#1–Co(1)–O(3)   | 177.81(19) |
| N(1)–Co(1)–O(3)#1   | 87.09(15)  |                     |            |
| Compound 2          |            |                     |            |
| Ni(1)–N(1)#1        | 2.046(5)   | P(1)–O(3)           | 1.517(4)   |
| Ni(1)–N(1)          | 2.046(5)   | P(1)–O(1)           | 1.556(4)   |
| Ni(1)–O(6)          | 2.076(4)   | P(1)–C(1)           | 1.835(6)   |
| Ni(1)–O(6)#1        | 2.076(4)   | P(2)–O(6)           | 1.499(4)   |
| Ni(1)–O(3)          | 2.116(4)   | P(2)–O(5)           | 1.551(4)   |
| Ni(1)–O(3)#1        | 2.116(4)   | P(2)–O(4)           | 1.567(5)   |
| P(1)–O(2)           | 1.508(4)   | P(2)–C(1)           | 1.835(6)   |
|                     |            |                     |            |
| N(1)#1–Ni(1)–N(1)   | 80.5(3)    | O(6)–Ni(1)–O(3)     | 94.53(16)  |
| N(1)#1–Ni(1)–O(6)   | 177.59(19) | O(6)#1–Ni(1)–O(3)   | 84.63(16)  |
| N(1)–Ni(1)–O(6)     | 97.40(19)  | N(1)#1–Ni(1)–O(3)#1 | 94.07(18)  |
| N(1)#1–Ni(1)–O(6)#1 | 97.40(19)  | N(1)–Ni(1)–O(3)#1   | 86.80(18)  |
| N(1)–Ni(1)–O(6)#1   | 177.59(19) | O(6)–Ni(1)–O(3)#1   | 84.63(16)  |
| O(6)–Ni(1)–O(6)#1   | 84.7(2)    | O(6)#1–Ni(1)–O(3)#1 | 94.53(16)  |
| N(1)#1–Ni(1)–O(3)   | 86.80(18)  | O(3)–Ni(1)–O(3)#1   | 178.9(2)   |
| N(1)–Ni(1)–O(3)     | 94.07(18)  |                     |            |

<sup>a</sup> Symmetry transformations used to generate equivalent atoms: #1 –x, y, –z + 3/2

**Table S2** Selected bond lengths (Å) and angles (deg) for compounds **3** and **4**<sup>a</sup>

| Compound <b>3</b>   |            |                     |           |
|---------------------|------------|---------------------|-----------|
| Co(1)–O(1)#1        | 2.087(4)   | P(1)–O(2)           | 1.509(4)  |
| Co(1)–O(1)          | 2.087(4)   | P(1)–O(3)           | 1.570(4)  |
| Co(1)–N(1)          | 2.110(5)   | P(1)–C(1)           | 1.835(6)  |
| Co(1)–N(1)#1        | 2.110(5)   | P(2)–O(6)           | 1.511(4)  |
| Co(1)–O(6)          | 2.144(4)   | P(2)–O(5)           | 1.541(4)  |
| Co(1)–O(6)#1        | 2.144(4)   | P(2)–O(4)           | 1.551(4)  |
| P(1)–O(1)           | 1.499(4)   | P(2)–C(1)           | 1.836(6)  |
|                     |            |                     |           |
| O(1)#1–Co(1)–O(1)   | 85.9(2)    | N(1)–Co(1)–O(6)     | 85.80(16) |
| O(1)#1–Co(1)–N(1)   | 97.27(18)  | N(1)#1–Co(1)–O(6)   | 96.91(16) |
| O(1)–Co(1)–N(1)     | 176.68(18) | O(1)#1–Co(1)–O(6)#1 | 93.66(15) |
| O(1)#1–Co(1)–N(1)#1 | 176.68(18) | O(1)–Co(1)–O(6)#1   | 83.76(15) |
| O(1)–Co(1)–N(1)#1   | 97.27(18)  | N(1)–Co(1)–O(6)#1   | 96.91(16) |
| N(1)–Co(1)–N(1)#1   | 79.6(3)    | N(1)#1–Co(1)–O(6)#1 | 85.80(16) |
| O(1)#1–Co(1)–O(6)   | 83.76(15)  | O(6)–Co(1)–O(6)#1   | 176.5(2)  |
| O(1)–Co(1)–O(6)     | 93.66(15)  |                     |           |
| Compound <b>4</b>   |            |                     |           |
| Ni(1)–N(1)          | 2.062(5)   | P(1)–O(2)           | 1.514(5)  |
| Ni(1)–N(1)#1        | 2.062(5)   | P(1)–O(3)           | 1.574(5)  |
| Ni(1)–O(1)#1        | 2.063(4)   | P(1)–C(1)           | 1.830(6)  |
| Ni(1)–O(1)          | 2.063(4)   | P(2)–O(6)           | 1.512(4)  |
| Ni(1)–O(6)#1        | 2.115(4)   | P(2)–O(5)           | 1.554(4)  |
| Ni(1)–O(6)          | 2.115(4)   | P(2)–O(4)           | 1.564(4)  |
| P(1)–O(1)           | 1.503(4)   | P(2)–C(1)           | 1.836(6)  |
|                     |            |                     |           |
| N(1)–Ni(1)–N(1)#1   | 81.6(3)    | O(1)#1–Ni(1)–O(6)#1 | 94.66(16) |
| N(1)–Ni(1)–O(1)#1   | 178.00(19) | O(1)–Ni(1)–O(6)#1   | 83.68(16) |
| N(1)#1–Ni(1)–O(1)#1 | 96.4(2)    | N(1)–Ni(1)–O(6)     | 95.98(18) |
| N(1)–Ni(1)–O(1)     | 96.4(2)    | N(1)#1–Ni(1)–O(6)   | 85.74(18) |
| N(1)#1–Ni(1)–O(1)   | 178.00(19) | O(1)#1–Ni(1)–O(6)   | 83.68(16) |
| O(1)#1–Ni(1)–O(1)   | 85.6(3)    | O(1)–Ni(1)–O(6)     | 94.66(16) |
| N(1)–Ni(1)–O(6)#1   | 85.74(18)  | O(6)#1–Ni(1)–O(6)   | 177.7(2)  |
| N(1)#1–Ni(1)–O(6)#1 | 95.98(18)  |                     |           |

<sup>a</sup> Symmetry transformations used to generate equivalent atoms. For **3**: #1 –x, y, –z + 3/2; For **4**: #1 –x, y, –z + 1/2



**Table S3** Hydrogen bonds for compounds **1** and **3**

| D-H...A       | D(D-H)/ Å | $d(\text{H}\cdots\text{A})/\text{Å}$ | D-H-A/deg | $d(\text{D}\cdots\text{A})/\text{Å}$ |
|---------------|-----------|--------------------------------------|-----------|--------------------------------------|
|               |           | compound <b>1</b>                    |           |                                      |
| O1W-H1WA...O7 | 0.85      | 2.40                                 | 166.8     | 3.237(8)                             |
|               |           | compound <b>3</b>                    |           |                                      |
| O4-H4A...O6   | 0.85      | 1.82                                 | 164.9     | 2.644(6)                             |
